# Supplementary material
Source: publisher site journal article supplement (https://www.dovepress.com/get_supplementary_file.php?f=238138.docx)

Fig. S1 (A) Expression level of FN protein measured by Western blotting. (B) Renal TGF-β1 concentration measured by ELISA. Values are represented as mean ± SD. *P < 0.05,** P < 0.01 vs. ahead group by student t-test. E-DM: Mice treated with oral enalapril (5mg/150ml water); EG-DM: mice treated with enalapril and pGPU6-shEgr1 plasmid; GV-DM: mice treated with pGPU6 vector plasmid (n=6).


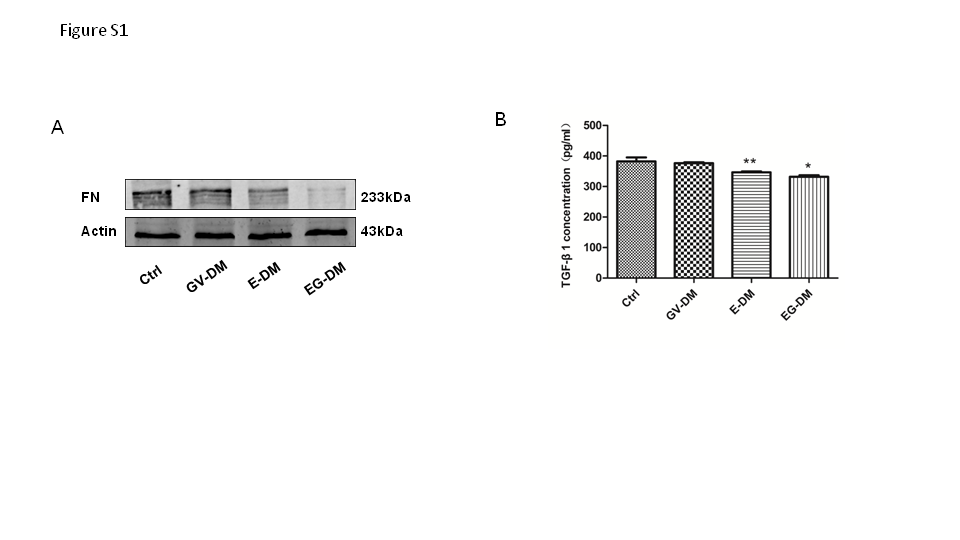

Supplement: Supplementary file 1 [file get_supplementary_file.php]
